1 **Impact of second-generation antipsychotics on white matter microstructure in**  
2 **adolescent-onset psychosis.**

3 Claudia Barth<sup>\*a</sup>, PhD; Vera Lonning<sup>a</sup>, MD; Tiril Pedersen Gurholt<sup>a,b</sup>, PhD; Ole A.  
4 Andreassen<sup>a,c</sup>, Professor; Anne M. Myhre<sup>c,d</sup>, Associate Professor, MD; Ingrid Agartz<sup>a,b,e</sup>,  
5 Professor.

6 <sup>a</sup> Norwegian Centre for Mental Disorders Research, KG Jebsen Centre for Psychosis  
7 Research, Institute of Clinical Medicine, University of Oslo, Oslo, Norway

8 <sup>b</sup> Department of Psychiatric Research, Diakonhjemmet Hospital, Oslo, Norway

9 <sup>c</sup> Norwegian Centre for Mental Disorders Research, KG Jebsen Centre for Psychosis  
10 Research, Division of Mental Health and Addiction, Oslo University Hospital, Oslo, Norway

11 <sup>d</sup> Child & Adolescent Mental Health Research Unit, Oslo University Hospital, Oslo, Norway

12 <sup>e</sup> Department of Clinical Neuroscience, Karolinska Institutet, Stockholm, Sweden

13

14 **\*Corresponding author:** Claudia Barth, PhD, E-Mail: [claudia.barth@medisin.uio.no](mailto:claudia.barth@medisin.uio.no), phone:  
15 +47 22 02 99 67, fax: +47 22 02 99 01, postal address: Institute of Clinical Medicine, Section  
16 Vinderen, University of Oslo, P.O. Box 85, Vinderen, N-0319 Oslo, Norway.

17

18

19

20

21

22

23

24

25

26

27

28 **Abstract**

29 White matter abnormalities are well-established in adult patients with psychosis. Yet less is  
30 known about changes in early onset psychosis (EOP) during adolescence, especially whether  
31 antipsychotic medication might impact white matter microstructure in this sensitive phase. Here,  
32 we utilized Magnetic Resonance Imaging (MRI) in unmedicated and medicated adolescent  
33 EOP patients in comparison to healthy controls to examine the impact of antipsychotic  
34 medication status on indices of white matter microstructure. Twenty-two EOP patients (11  
35 unmedicated) and 33 healthy controls, aged between 12-18 years, underwent 3T diffusion-  
36 weighted MRI. Using Tract-based Spatial Statistics, we calculate case-control differences in  
37 scalar diffusion measures, e.g. fractional anisotropy (FA), and investigated their association  
38 with antipsychotic medication. We replicated previous results from studies in EOP patients  
39 showing significantly decreased mean FA including the left genu of the corpus callosum, the  
40 left anterior corona radiata and the right superior longitudinal fasciculus in patients relative to  
41 healthy controls. Mean FA in the left anterior corona radiata was significantly associated with  
42 antipsychotic medication status, showing higher FA values in medicated compared to  
43 unmedicated EOP patients. Increased regional FA values might be a first hint towards an early  
44 effect of antipsychotic medication on white matter microstructure in adolescent EOP patients.

45

46

47

48

49

50

51

52

53

54

## 55 Introduction

56 A variety of hypotheses has been proposed to explain the etiology of psychotic disorders,  
57 including aberrant dopamine neurotransmission <sup>1</sup>, altered neurodevelopmental trajectories <sup>2</sup>,  
58 and active neuroinflammation <sup>3</sup>. Such theories are not mutually exclusive and are more likely  
59 complementary. Patients with early onset psychosis (EOP), with defined age of onset before  
60 18 years, provide an unprecedented opportunity to specifically investigate the perspective of  
61 aberrant neurodevelopment.

62 The application of diffusion weighted imaging (DWI) can relate white matter organization to  
63 disease. DWI maps the Brownian movement of water molecules in the brain in vivo, and as  
64 axon membranes and myelin provide natural barriers for water diffusion, DWI can be used to  
65 infer local tissue properties <sup>4</sup>. The most commonly used scalar measure is fractional anisotropy  
66 (FA), which characterizes the degree of diffusion directionality. For an in-depth evaluation of  
67 FA, the relative contribution of axial diffusion (AD) along the primary axis, and radial diffusion  
68 (RD) perpendicular to it, can be informative. RD has been associated with changes in myelin  
69 <sup>5</sup>, and a disruption of myelin sheaths may be reflected in an increased RD. Conversely, AD  
70 has been linked to axonal integrity and axonal damage may be characterized by decreased  
71 AD <sup>4</sup>.

72 Using DWI, a number of studies show widespread FA reductions in many different brain  
73 regions with low spatial overlap such as corpus callosum, cingulum, superior longitudinal  
74 fasciculus, inferior longitudinal fasciculus and fronto-occipital fasciculus in EOP patients  
75 compared to healthy controls <sup>6-10</sup>. Scalar DWI measures beyond FA are rarely analyzed in EOP  
76 populations. However, Lagopoulos and colleagues report on increased RD values, indicative  
77 of potential demyelinating processes underlying the observed white matter abnormalities <sup>10</sup>.

78 The low degree of regional specificity of white matter changes seems to be attributed to a  
79 number of factors including differences in image acquisition, different analysis approaches  
80 (ROI vs voxel-wise), small sample sizes, low prevalence of EOP (estimated prevalence of 17.6  
81 in 10,000 at age of 18 years, <sup>11</sup>) and differing sample characteristics such as age of onset.  
82 Further, antipsychotic medication status might also affect the pattern of white matter  
83 microstructure in EOP.

84 Studies investigating white matter microstructure in EOP mainly focus on case-control  
85 differences, either reporting antipsychotic effects as secondary findings or using antipsychotic  
86 medication status as a covariate of no interest. So far, studies in EOP patients do not indicate  
87 an impact of either current <sup>12-14</sup> or cumulative antipsychotic exposure <sup>6,13,15</sup> on scalar DWI  
88 measures. The absence of an antipsychotic medication effect could reflect small sample sizes

89 and young patients with shorter medication histories. The apparent limitations of the  
90 adolescent study population also hold potential advantages: EOP patients are less affected by  
91 chronic exposure to antipsychotic medication in comparison to their adult counterparts, which  
92 allows for dissecting medication-mediated from disease-related effects on brain structure.  
93 Furthermore, according to the World Health Organization guideline for pharmacological  
94 interventions in adolescents with psychotic disorders (2015), antipsychotic medication use is  
95 significantly less recommended in comparison to adult patients with psychosis<sup>16</sup>. This partly  
96 translates to a clinical practice of a higher reluctance in starting antipsychotic treatment early  
97 in the course of psychosis in children and adolescents, leading to a higher percentage of  
98 antipsychotic-naïve EOP patients relative to adult first episode patients with psychosis. Thus,  
99 EOP patients represent an ideal population to investigate the impact of antipsychotic  
100 medication on white matter structure early in disease progression.

101 Here, we use a thoroughly clinically characterized adolescent EOP sample to (1) investigate  
102 white matter microstructure in comparison to healthy controls, and (2) explore the association  
103 between second-generation antipsychotic medication and white matter microstructure in  
104 medicated compared to currently unmedicated/antipsychotic-naïve EOP patients. We utilize  
105 DWI and, by using Tract-Based Spatial Statistics (TBSS), we calculate FA and its scalar sub-  
106 measures, RD and AD, and investigate their association with antipsychotic medication and  
107 other clinical measures (e.g. Positive and Negative Syndrome Scale, etc.). Based on the  
108 existing literature, we hypothesized that EOP patients show widespread reduced FA attended  
109 by increased RD and unchanged AD compared to healthy controls, mainly in the corpus  
110 callosum and superior/inferior longitudinal fasciculus. As there are no established effects of  
111 antipsychotic medication on white matter structure in EOP patients, our post hoc analysis is  
112 exploratory by nature.

113

114

115

116

117

118

## 119 **Results**

### 120 ***Demographic and clinical data***

121 As presented in Table 1, EOP patients did not differ significantly from controls in general  
122 demographic variables such as age, handedness and IQ. However, there was a significant  
123 case-control difference in clinical measures such as CGAS and MFQ, reflecting the clinical  
124 diagnosis. EOP patients showed higher impairment of general functioning evaluated with  
125 CGAS and exhibited significantly more depressive symptoms using MFQ, relative to their  
126 healthy counterparts. Furthermore, patients report significantly more cannabis use than  
127 controls.

128 Within the patient group (Table 2), patients on antipsychotic medication were significantly older  
129 than unmedicated patients ( $t = -4.186$ ,  $p = 0.0006$ ). In line with antipsychotic medication status,  
130 duration of untreated psychosis (DUP) was significantly longer in the unmedicated EOP  
131 subgroup in comparison to the medicated group. Further demographic and clinical variables  
132 did not differ significantly between the patient subgroups.

### 133 ***TBSS analyses***

134 Voxel-wise statistical analysis of case-control differences revealed decreases in mean FA  
135 including the left genu of the corpus callosum, the left anterior corona radiata (ACR), and the  
136 right superior longitudinal fasciculus (SLF) in EOP patients compared to healthy controls (see  
137 Figure 1 and Table 3). There was no increase in mean FA for the opposing contrast.

138 Applying the TBSS pipeline to diffusion-derived data other than FA, namely RD and AD, did  
139 not yield significant case-control differences for RD, but decreases in mean AD overlapping  
140 with FA findings in EOP patients in comparison to healthy controls. In detail, mean AD shows  
141 significantly decreases in the left ACR (see supplementary Table S2), in addition to decreases  
142 in the right posterior limb of the internal capsule (PLIC) and right superior fronto-occipital  
143 fasciculus (SFOF).

144 Extracted mean values of all scalar diffusion measures for all significant clusters stratified by  
145 group are displayed in supplementary Figure S1 for descriptive purposes only. In the interest  
146 of transparency, TBSS case-control differences in mean FA and mean AD (patients < controls)  
147 at a cluster-forming threshold of  $p \leq 0.05$  are also presented (see supplementary Figure S2).

### 148 ***Linear regression analyses***

149 To evaluate the potential influence of duration of illness and antipsychotic treatment on regional  
150 mean FA and mean AD values within significant TBSS clusters, in patients, linear regression

151 analyses were performed. While duration of illness was not significantly associated with mean  
152 FA in any of the clusters, we found a significant negative association with mean AD in the left  
153 ACR ( $t = -2.364$ ,  $p = 0.029$ ). For latter association, however, the regression equation was not  
154 significant ( $p = 0.085$ ) and the overall explanatory power of the model was low ( $R^2 = 0.147$ ),  
155 rendering this finding most likely spurious (see supplementary Table S1).

156 Exposure to antipsychotic medication was significantly associated with mean FA values in the  
157 left ACR ( $t = 2.991$ ,  $p = 0.008$ ), showing higher mean FA in medicated relative to the  
158 unmedicated patients (Figure 2). There was no association between antipsychotic medication  
159 and mean FA or mean AD in the other significant TBSS clusters (see supplementary Table  
160 S1). Cohen's  $d$  effect size values suggest a high ( $d = 1.48$ ) and a low ( $d = -0.08$ ) standardized  
161 difference in mean FA of the left ACR in unmedicated and medicated EOP patients relative to  
162 healthy controls, respectively (Figure 3). Based on visual inspection, higher mean FA in  
163 medicated patients seems driven by an increase in AD and a decrease in RD (Figure 2).  
164 However, mean AD and RD did not differ significantly between medicated and unmedicated  
165 patients (Welch Two Sample  $t$ -test, AD:  $t = 0.183$ ,  $p = 0.857$ ; RD:  $t = 1.887$ ,  $p = 0.079$ ).

#### 166 ***Association with clinical measures***

167 We found no association between current antipsychotic medication evaluated as  
168 chlorpromazine equivalent at scan day (CPZ, Spearman  $\rho = 0.13$ ,  $n = 11$ ,  $p = 0.695$ ) or  
169 cumulative CPZ (Pearson  $\rho = -0.15$ ,  $n = 11$ ,  $p = 0.665$ ) with regional mean FA values in the  
170 left ACR.

171 In addition, we also found no significant correlations, which survived correction for multiple  
172 comparisons (FA cluster: Bonferroni,  $\alpha = 0.003$ ; AD cluster: Bonferroni,  $\alpha = 0.004$ ), between  
173 neither extracted mean FA nor mean AD values of all significant TBSS clusters and clinical  
174 measures such as PANSS (neither positive nor negative), CGAS and MFQ scores.

175

176

177

## 178 Discussion

179 Our case-control results replicate prominent brain regions with known white matter  
180 abnormalities implicated in EOP, namely corpus callosum<sup>6</sup>, right SLF<sup>14,17,18</sup> and the left ACR  
181<sup>9,10</sup>. Intriguingly, lower FA in these regions seems to occur early in the disease process<sup>10,18,19</sup>.  
182 For instance, Lagopoulos and colleagues found a decrease in FA in the left ACR in both  
183 patients with established psychiatric disorder and patients exhibiting sub-syndromal symptoms,  
184 aged 14-30 years. Based on these findings, the authors proposed that abnormalities in the left  
185 ACR are a putative precursor to the development of a psychiatric condition<sup>10</sup>.

186 However, the ACR is a highly heterogeneous structure with three long-range association fiber  
187 tracts traversing through it<sup>10</sup>: anterior thalamic radiation (ATR), inferior fronto-occipital  
188 fasciculus (IFOF) and uncinate fasciculus (UF). All three association fibers form connections  
189 to the frontal lobe and have been implicated in the pathophysiology of psychiatric disorders  
190<sup>10,20-22</sup>. In the current study, the left ACR peak voxel shows a 16% probability of IFOF  
191 involvement based on the JHU White-Matter Tractography Atlas. The IFOF connects the  
192 occipital and temporal lobes with the orbitofrontal cortex as part of the ventral visual and  
193 language stream. In particular, the left IFOF seems to subserve language semantics<sup>23</sup>. Already  
194 in 1996, Aloia and colleagues proposed that the disruption of semantic networks have potential  
195 implications for the origin of “thought disorder” in schizophrenia<sup>24</sup>. Adding to this hypothesis,  
196 patients with 22q11.2 deletion syndrome, who are genetically at high risk for developing  
197 schizophrenia, showed lower FA values in left IFOF<sup>25</sup>. Furthermore, DeRosse and colleagues  
198 found that lower FA proximal to the SLF and corticospinal tract bilaterally, and left IFOF and  
199 left inferior longitudinal fasciculus (ILF), were associated with higher levels of psychotic-like  
200 experiences in otherwise healthy volunteers<sup>26</sup>. In early-onset schizophrenia (EOS) patients,  
201 lower FA in the left IFOF and the left ILF predicted worse neurocognitive performance<sup>9</sup>. The  
202 authors also detected a shared decrease in FA in the left IFOF among patients with clinical  
203 high risk for schizophrenia and patients with established EOS, in comparison to healthy  
204 controls. Together, these findings suggest that white matter abnormalities in the left ACR,  
205 putatively in the left IFOF, may represent a potential candidate for understanding the etiology  
206 of psychosis.

207 This assumption seems further supported by effects of antipsychotic medication on diffusion  
208 metrics in the left ACR. We found that FA values in the left ACR were significantly predicted  
209 by antipsychotic medication status, with higher FA values in medicated relative to unmedicated  
210 EOP patients. No such association was found with the other brain regions showing significantly  
211 decreased FA values. Besides the high Cohen’s d effect size estimate (Figure 2), we found no  
212 significant association of regional FA with either current or cumulative antipsychotic exposure.

213 This lack of significant associations is, however, in line with previous studies in EOP patients  
214 <sup>6,12-15</sup> and likely due to the fairly short medication history in EOP patients compared to their  
215 adult-onset counterparts or limited sample size. Hence, the presence of antipsychotic  
216 medication rather than the actual dose might induce the observed changes in white matter  
217 microstructure.

218 In medicated patients, increased FA values seem to be driven by an increase in AD and a  
219 decrease in RD, relative to their unmedicated counterparts (Figure 2). Thus, FA might be  
220 enhanced by antipsychotic medication as a result of both facilitated parallel diffusivity (AD,  
221 potentially mediated by an increase in axon numbers, and restricted perpendicular diffusivity  
222 (RD), indicative of changes in myelin.

223 Converging evidence from multiple studies suggests oligodendroglial dysfunction, with  
224 subsequent abnormalities in myelin maintenance and repair, to underpin white matter  
225 abnormalities observed in psychotic patients <sup>27</sup>. In the framework of schizophrenia, it has been  
226 proposed that myelin dysfunction, especially in frontal regions, contributes to psychotic  
227 symptoms <sup>13,27</sup>. Based on findings from cell culture studies using aripiprazole <sup>28</sup> and rodent  
228 work using quetiapine <sup>29,30</sup>, second-generation antipsychotic medication may promote  
229 oligodendrocyte recovery and myelin repair leading to reduced white matter abnormalities and,  
230 subsequently, reduced psychotic symptoms. A recent study in patients with schizophrenia also  
231 reports on promyelinating effects of antipsychotics <sup>31</sup>. Tishler and colleagues found an increase  
232 in intracortical myelin predominantly mediated by risperidone and other second-generation  
233 antipsychotics in adult patients with schizophrenia compared to healthy controls within the first  
234 year of treatment. In the current study, given that medicated EOP patients received either  
235 aripiprazole, quetiapine or risperidone, one might speculate that early medication with second-  
236 generation antipsychotics might affect white matter microstructure by remediating  
237 oligodendroglial dysfunction, leading to an increase in FA detected by DWI.

238 Even though FA is highly sensitive to microstructural changes in general, it lacks  
239 neurobiological specificity to the exact type of change <sup>4</sup>. For instance, a decrease in FA can  
240 reflect alternations in fiber organization, including packing density and fiber crossing, and  
241 myelin loss or myelin remodeling <sup>32</sup>. We found a widespread decrease of AD on a whole brain  
242 level, indicative of axonal damage, but no changes were found in RD, relative to healthy  
243 controls. This finding is not in line with previous work from Lagopoulos and colleagues, who  
244 found a decrease in FA in the left ACR associated with increases in RD and no changes in AD  
245 <sup>10</sup>.

246 Although there are likely several reasons for these conflicting findings, neuroinflammatory  
247 processes might pose particular difficulties in interpreting DWI signals in psychotic populations



248 <sup>33</sup>. For instance, in an animal model of cuprizone-induced demyelination of corpus callosum,  
249 regions with extensive axonal edema and prominent cellular inflammation showed no change  
250 in RD, while AD values were diminished at the beginning of demyelination <sup>34</sup>. Given the  
251 neuroinflammation hypothesis of schizophrenia <sup>3</sup>, it seems likely that the disease progression  
252 encompasses a dynamic evolution of inflammation, axonal injury, and myelin degeneration. In  
253 the current study, one might speculate that EOP patients are on the verge of undergoing  
254 demyelination processes, reflected by widespread decreases in AD. However, the timing of  
255 neuroinflammation in psychotic disorders relative to tissue injury is unclear, leading to a  
256 heightened risk of misinterpreting changes in DWI measures. According to a recent review of  
257 Winklewski and colleagues, in cases of neuroinflammation linked to tissue damage, DWI  
258 seems to underestimate the extent of demyelination (undervalued RD), and overestimate the  
259 extent of axonal injury (overvalued AD) <sup>35</sup>. This pattern seems replicated in our study, with  
260 significant changes in AD and no changes in RD. As the consistency of DWI metrics seems  
261 affected by brain edema and inflammatory response, future studies can benefit from using  
262 tools such as free water imaging which provide the opportunity to separate the contribution of  
263 extracellular water from the diffusion of water molecules inside the fiber tracts, leading to a  
264 higher specificity in detecting structural changes <sup>36</sup>.

265 Deviations in scalar DWI measures in the current study relative to previous studies could also  
266 be due to ongoing white matter maturation processes in our adolescent EOP sample. In  
267 healthy individuals, age-related increases in FA during childhood, adolescence and early  
268 adulthood have been consistently reported <sup>37-40</sup>. This increase in FA seems primarily driven by  
269 a reduction in RD, while AD remains fairly stable or decreases slightly <sup>41,42</sup>. Findings for AD  
270 changes during the transition to adulthood are less consistent <sup>37-40</sup>. Thus, the AD difference  
271 found in the current study could also be attributed to developmental processes, which may  
272 fade as adolescents mature into adulthood.

273 However, it should be noted that the neurodevelopmental trajectories of white matter structure  
274 relative to disease progression in EOP patients are unclear. So far, three different studies  
275 yielded inconclusive results, postulating either diverging <sup>13</sup>, converging <sup>43</sup>, or parallel <sup>44</sup>  
276 trajectories relative to healthy controls. In the current study, we did not find any predictive value  
277 of duration of illness for regional FA. This is in line with previous findings from Kumra and  
278 colleagues, who speculated that the decrease in FA in EOP patients compared to healthy  
279 controls reflects developmental abnormalities rather than secondary effects of the disease  
280 progression <sup>13</sup>. In addition, Epstein and Kumra found lower FA in the inferior longitudinal  
281 fasciculus, IFOF and corticospinal tract, but no significant group differences in longitudinal  
282 changes in FA <sup>44</sup>. Thus, the observed changes in the current study might persist but do not

283 affect the overall white matter maturation trajectories. However, the cross-sectional nature of  
284 the current study precludes the assessment of developmental effects over time.

285 The results of the current study should be considered in the context of several limitations.  
286 Unmedicated EOP patients were significantly younger than those receiving medication.  
287 Although the analysis was corrected for age, we cannot exclude that the age of the patients  
288 contributes to the observed antipsychotic-medication related changes in white matter structure.  
289 It is possible that time-of-measurement effects, with older patients having higher FA values  
290 than younger patients due to more advanced white matter maturation, could confound our  
291 results. However, while we acknowledge this possibility, we consider this unlikely to be the  
292 driving mechanism for the following reason: we would expect differences in FA values in other  
293 regions showing a similar maturation trajectory, such as the SLF <sup>41</sup>, if our results were mainly  
294 driven by age differences. This was not the case, as we found no significant difference in mean  
295 FA values of the SLF between medicated and unmedicated patients ( $t = -0.56934$ ,  $p\text{-value} =$   
296  $0.576$ ). We further stress that we did not find any associations between regional FA variation  
297 and clinical measures such as PANSS scores, which is likely due to the relatively small sample  
298 size.

299 In summary, the present study is the first to link antipsychotic medication status to altered  
300 regional FA in the left ACR in patients with EOP. Understanding the significance of white matter  
301 abnormalities in the left ACR in adolescents with EOP and the putatively remediating effect of  
302 antipsychotic medication, may help to phenotype the disease and to develop new  
303 pharmacological regimes to subsequently improve functional outcome. Assuming that  
304 antipsychotic medication reverses the hypothesized myelin dysfunction in psychosis, early  
305 interventions with antipsychotic medication, already in individuals at risk of developing  
306 psychosis, could provide the opportunity to normalize white matter maturation. Although  
307 exciting, further work is needed to draw firm conclusions about the beneficial effects of  
308 antipsychotic medication early in the disease process. Building on our first results, longitudinal  
309 studies with larger samples sizes using high resolution DWI in combination with clinical, genetic  
310 and neurocognitive measures are warranted to delineate heritability, affected brain regions,  
311 antipsychotic medication effects, and directions of FA changes over time.

## 312 **Methods**

### 313 ***Participants***

314 The study sample was drawn from the ongoing longitudinal Youth-Thematic-Organized-  
315 Psychosis (Youth-TOP) research study, which is a subdivision of the TOP research  
316 group/NORMENT and KG Jebsen center of psychosis research in Oslo, Norway. EOP patients,  
317 aged between 12-18 years, were recruited from in- and outpatient clinics in the Oslo region.  
318 Healthy controls were randomly selected from the Norwegian National Registry in the same  
319 catchment area. All participants and their respective parents/guardians provided written  
320 informed consent. The study was approved by the Regional Committee for Medical Research  
321 Ethics (REK-Sør) and the Norwegian Data Inspectorate and was conducted in accordance  
322 with the Declaration of Helsinki.

323 For study inclusion, participants were required to have an intelligence quotient (IQ) > 70, a  
324 good command of the Norwegian language, no previous moderate to severe head injuries, no  
325 diagnosis of substance-induced psychotic disorder, and no organic brain disease. IQ was  
326 measured by the Wechsler Abbreviated Scale of Intelligence<sup>45</sup>. Diagnosis was established  
327 according to the Diagnostic and Statistical Manual of Mental Disorder- IV criteria using the  
328 Norwegian version of the Kiddie-Schedule for Affective Disorders and Schizophrenia for  
329 School Aged Children (6-18 years): Present and Lifetime Version (K-SADS-PL<sup>46</sup>). The clinical  
330 characterization was conducted by trained psychologists or psychiatrists.

331 A total of 67 participants (27 patients/40 controls) satisfied the above-mentioned criteria and  
332 underwent MRI examination. All MRI scans were visually inspected by a trained  
333 neuroradiologist to rule out any pathological changes. Out of the initial sample, seven control  
334 participants and five patients were excluded due to (i) clinical/radiological reasons (five  
335 patients/ three controls), or (ii) strong motion artefacts in the diffusion imaging data (four  
336 controls), resulting in a final sample of 55 participants (22 patients/ 33 controls) being entered  
337 in the statistical analysis.

338 Sample demographics and clinical characteristics separated by antipsychotic medication  
339 status of EOP patients are reported in Table 1 and Table 2, respectively.

### 340 ***Clinical measures***

341 Presence and severity of psychopathological symptoms of EOP patients were assessed using  
342 the Positive and Negative Syndrome Scale (PANSS<sup>47</sup>). Children Global Assessment Scale  
343 (CGAS<sup>48</sup>) and Mood and Feelings Questionnaire (MFQ, long version<sup>49</sup>) were evaluated in all  
344 participants to measure general functioning level and to screen for depressive symptoms,

345 respectively. Recreational drug use was assessed within the structured K-SADS interview and  
346 scored with 0 or 1 for absent or present. For EOP patients, current and lifetime cumulative use  
347 of medication was recorded and converted into chlorpromazine equivalents (CPZ), using  
348 formulas published elsewhere<sup>50</sup>. While 11 EOP patients were off any antipsychotic medication  
349 at scan, yielding a lack of current CPZ values, 3 patients had received pharmacological  
350 treatment prior to inclusion, resulting in a low cumulative CPZ dosage for this subgroup (see  
351 Table 2).

### 352 ***MRI data acquisition***

353 MR images were acquired on a 3-Tesla General Electric Signa HDxt scanner equipped with  
354 an 8-channel head coil at the Oslo University Hospital, Norway. The diffusion imaging data  
355 was acquired using a 2D spin-echo whole-brain echo-planar imaging sequence with the  
356 following parameters: slice thickness = 2.5 mm, repetition time = 15 s, echo time = 85 ms, flip  
357 angle = 90°, acquisition matrix = 96 x 96, in-plane resolution = 1.875 x 1.875 mm. A total of 32  
358 volumes with different gradient directions ( $b = 1000 \text{ s/mm}^2$ ), including two  $b_0$ -volumes with  
359 reversed phase-encode (blip up/down), were acquired.

### 360 ***Diffusion data analysis***

361 Diffusion data were analyzed with FSL version 5.0.9 using the FMRIB's software library  
362 (<https://fsl.fmrib.ox.ac.uk/fsl/fslwiki>). Before creating voxel wise maps of diffusion parameters,  
363 the following steps of the standard processing pipeline were used: (i) *topup* to correct for  
364 susceptibility-induced distortions<sup>51,52</sup>, (ii) *eddy* current correction to correct for gradient-coil  
365 distortions and head motion<sup>53</sup>, (iii) removal of non-brain tissue using the Brain Extraction Tool  
366 (*bet*)<sup>54</sup>, and (iv) local fitting of the diffusion tensor at each voxel using *dtifit* (FMRIB's Diffusion  
367 Toolbox (FDT)<sup>55</sup>). *Dtfit* yielded in voxel wise participant-specific maps of FA, mean diffusion  
368 (MD), and axial diffusivity (AD, derived from eigenvector  $\lambda_1$ ). Based on the outputted  
369 eigenvectors  $\lambda_2$  and  $\lambda_3$ , radial diffusivity (RD) was computed  $((\lambda_2 + \lambda_3)/2)$ . Next, voxel wise  
370 statistical analysis of the FA data was carried out using TBSS<sup>56</sup>. First, all FA images were  
371 nonlinearly aligned to the most representative FA image out of all images and transformed into  
372  $1 \times 1 \times 1 \text{ mm}^3$  MNI152 standard space by means of affine registration. Secondly, TBSS projects  
373 all participant's FA data onto a mean FA tract skeleton (threshold FA > 0.25), before applying  
374 voxel wise cross-participant statistics. After TBSS for FA was completed, results were used to  
375 generate skeletonized RD and AD data for additional voxel-wise group comparisons using the  
376 TBSS non-FA pipeline.

377

378 **Statistical analyses**

379 For contrasting case-control differences, we run voxel-wise statistics, co-varied for age and  
380 gender, using a nonparametric permutation-based approach (*Randomise*, implemented in FSL,  
381 5000 permutations). All variables were demeaned. The statistical threshold was set at  $p \leq 0.01$ ,  
382 after family-wise error correction for multiple comparisons using threshold-free cluster  
383 enhancement. We chose a highly conservative threshold for FA to minimize type I errors and  
384 to better account for the exploratory nature of the study concerning the impact of antipsychotic  
385 medication status. For RD and AD, the same statistical model was used.

386 Regions identified with TBSS (FA) and TBSS non-FA (RD or AD) were subsequently used as  
387 masks to extract mean FA, RD and AD values for plotting and further analysis. We refrained  
388 from using MD values, as a measure of overall diffusivity within a voxel, in further analysis due  
389 to its lack of specificity<sup>4</sup>. As scalar diffusion measures largely vary in their value ranges,  
390 extracted mean values were z-standardized for plotting purposes using the following formula:  
391  $z = (\text{participant's value} - \text{group mean}) / \text{standard deviation}$ .

392 A linear regression model was performed to examine whether patients' mean values of  
393 significant TBSS and TBSS non-FA clusters were associated with duration of illness and  
394 antipsychotic medication status as categorical variable (coded as yes (1)/no (0)). The effect  
395 size was reported as Cohen's  $d$ <sup>57</sup>.

396 If there is an association between patients' regional mean values and antipsychotic medication,  
397 follow-up correlation analysis with current and cumulative CPZ were performed using  
398 Spearman's rank correlation rho for non-normal data.

399 Further analysis of regional mean values and its association with clinical measures (PANSS,  
400 CGAS, MFQ) were performed using Pearson's product moment correlation coefficient.

401 Statistical tests were conducted in R, version 3.5.2 ([www.r-project.org](http://www.r-project.org)).

402

403

404

405

406

## 407 References

- 408 1 Jauhar, S. *et al.* A Test of the Transdiagnostic Dopamine Hypothesis of Psychosis  
409 Using Positron Emission Tomographic Imaging in Bipolar Affective Disorder and  
410 Schizophrenia. *JAMA Psychiatry* **74**, 1206-1213,  
411 doi:10.1001/jamapsychiatry.2017.2943 (2017).
- 412 2 Rapoport, J. L., Giedd, J. N. & Gogtay, N. Neurodevelopmental model of  
413 schizophrenia: update 2012. *Mol Psychiatry* **17**, 1228-1238, doi:10.1038/mp.2012.23  
414 (2012).
- 415 3 Najjar, S. & Pearlman, D. M. Neuroinflammation and white matter pathology in  
416 schizophrenia: systematic review. *Schizophr Res* **161**, 102-112,  
417 doi:10.1016/j.schres.2014.04.041 (2015).
- 418 4 Alexander, A. L., Lee, J. E., Lazar, M. & Field, A. S. Diffusion tensor imaging of the  
419 brain. *Neurotherapeutics* **4**, 316-329, doi:10.1016/j.nurt.2007.05.011 (2007).
- 420 5 Song, S. K. *et al.* Dysmyelination revealed through MRI as increased radial (but  
421 unchanged axial) diffusion of water. *Neuroimage* **17**, 1429-1436 (2002).
- 422 6 Douaud, G. *et al.* Anatomically related grey and white matter abnormalities in  
423 adolescent-onset schizophrenia. *Brain* **130**, 2375-2386, doi:10.1093/brain/awm184  
424 (2007).
- 425 7 James, A. *et al.* Greater white and grey matter changes associated with early  
426 cannabis use in adolescent-onset schizophrenia (AOS). *Schizophr Res* **128**, 91-97,  
427 doi:10.1016/j.schres.2011.02.014 (2011).
- 428 8 Ashtari, M. *et al.* Disruption of white matter integrity in the inferior longitudinal  
429 fasciculus in adolescents with schizophrenia as revealed by fiber tractography. *Arch*  
430 *Gen Psychiatry* **64**, 1270-1280, doi:10.1001/archpsyc.64.11.1270 (2007).
- 431 9 Epstein, K. A. *et al.* White matter abnormalities and cognitive impairment in early-  
432 onset schizophrenia-spectrum disorders. *J Am Acad Child Adolesc Psychiatry* **53**,  
433 362-372 e361-362, doi:10.1016/j.jaac.2013.12.007 (2014).
- 434 10 Lagopoulos, J. *et al.* Microstructural white matter changes are correlated with the  
435 stage of psychiatric illness. *Transl Psychiatry* **3**, e248, doi:10.1038/tp.2013.25 (2013).
- 436 11 Gillberg, C., Wahlstrom, J., Forsman, A., Hellgren, L. & Gillberg, I. C. Teenage  
437 psychoses--epidemiology, classification and reduced optimality in the pre-, peri- and  
438 neonatal periods. *J Child Psychol Psychiatry* **27**, 87-98 (1986).
- 439 12 Moran, M. E. *et al.* Comparing fractional anisotropy in patients with childhood-onset  
440 schizophrenia, their healthy siblings, and normal volunteers through DTI. *Schizophr*  
441 *Bull* **41**, 66-73, doi:10.1093/schbul/sbu123 (2015).
- 442 13 Kumra, S. *et al.* White matter abnormalities in early-onset schizophrenia: a voxel-  
443 based diffusion tensor imaging study. *J Am Acad Child Adolesc Psychiatry* **44**, 934-  
444 941, doi:10.1097/01.chi.0000170553.15798.94 (2005).
- 445 14 Kyriakopoulos, M., Vyas, N. S., Barker, G. J., Chitnis, X. A. & Frangou, S. A diffusion  
446 tensor imaging study of white matter in early-onset schizophrenia. *Biol Psychiatry* **63**,  
447 519-523, doi:10.1016/j.biopsych.2007.05.021 (2008).
- 448 15 Kyriakopoulos, M. *et al.* Effect of age at onset of schizophrenia on white matter  
449 abnormalities. *Br J Psychiatry* **195**, 346-353, doi:10.1192/bjp.bp.108.055376 (2009).
- 450 16 Organization, W. H. Pharmacological interventions in adolescents with psychotic  
451 disorders. (2015).
- 452 17 Schwehm, A. *et al.* Age and Sex Effects on White Matter Tracts in Psychosis from  
453 Adolescence through Middle Adulthood. *Neuropsychopharmacology* **41**, 2473-2480,  
454 doi:10.1038/npp.2016.47 (2016).
- 455 18 Karlsgodt, K. H. *et al.* Diffusion tensor imaging of the superior longitudinal fasciculus  
456 and working memory in recent-onset schizophrenia. *Biol Psychiatry* **63**, 512-518,  
457 doi:10.1016/j.biopsych.2007.06.017 (2008).
- 458 19 DeRosse, P. *et al.* White Matter Abnormalities Associated With Subsyndromal  
459 Psychotic-Like Symptoms Predict Later Social Competence in Children and  
460 Adolescents. *Schizophr Bull* **43**, 152-159, doi:10.1093/schbul/sbw062 (2017).

- 461 20 Kawashima, T. *et al.* Uncinate fasciculus abnormalities in recent onset schizophrenia  
462 and affective psychosis: a diffusion tensor imaging study. *Schizophr Res* **110**, 119-  
463 126, doi:10.1016/j.schres.2009.01.014 (2009).
- 464 21 Sprooten, E. *et al.* The relationship of anterior thalamic radiation integrity to psychosis  
465 risk associated neuregulin-1 variants. *Mol Psychiatry* **14**, 237-238, 233,  
466 doi:10.1038/mp.2008.136 (2009).
- 467 22 Joo, S. W. *et al.* Altered white matter connectivity in patients with schizophrenia: An  
468 investigation using public neuroimaging data from SchizConnect. *PLoS One* **13**,  
469 e0205369, doi:10.1371/journal.pone.0205369 (2018).
- 470 23 Almairac, F., Herbet, G., Moritz-Gasser, S., de Champfleury, N. M. & Duffau, H. The  
471 left inferior fronto-occipital fasciculus subserves language semantics: a multilevel  
472 lesion study. *Brain Struct Funct* **220**, 1983-1995, doi:10.1007/s00429-014-0773-1  
473 (2015).
- 474 24 Aloia, M. S., Gourovitch, M. L., Weinberger, D. R. & Goldberg, T. E. An investigation  
475 of semantic space in patients with schizophrenia. *J Int Neuropsychol Soc* **2**, 267-273  
476 (1996).
- 477 25 Kikinis, Z. *et al.* Genetic contributions to changes of fiber tracts of ventral visual  
478 stream in 22q11.2 deletion syndrome. *Brain Imaging Behav* **7**, 316-325,  
479 doi:10.1007/s11682-013-9232-5 (2013).
- 480 26 DeRosse, P. *et al.* Adding insult to injury: childhood and adolescent risk factors for  
481 psychosis predict lower fractional anisotropy in the superior longitudinal fasciculus in  
482 healthy adults. *Psychiatry Res* **224**, 296-302, doi:10.1016/j.psychres.2014.09.001  
483 (2014).
- 484 27 Davis, K. L. *et al.* White matter changes in schizophrenia: evidence for myelin-related  
485 dysfunction. *Arch Gen Psychiatry* **60**, 443-456, doi:10.1001/archpsyc.60.5.443  
486 (2003).
- 487 28 Seki, Y. *et al.* Pretreatment of aripiprazole and minocycline, but not haloperidol,  
488 suppresses oligodendrocyte damage from interferon-gamma-stimulated microglia in  
489 co-culture model. *Schizophr Res* **151**, 20-28, doi:10.1016/j.schres.2013.09.011  
490 (2013).
- 491 29 Bi, X. *et al.* Quetiapine prevents oligodendrocyte and myelin loss and promotes  
492 maturation of oligodendrocyte progenitors in the hippocampus of global cerebral  
493 ischemia mice. *J Neurochem* **123**, 14-20, doi:10.1111/j.1471-4159.2012.07883.x  
494 (2012).
- 495 30 Zhang, Y. *et al.* Quetiapine enhances oligodendrocyte regeneration and myelin repair  
496 after cuprizone-induced demyelination. *Schizophr Res* **138**, 8-17,  
497 doi:10.1016/j.schres.2012.04.006 (2012).
- 498 31 Tishler, T. A. *et al.* Abnormal Trajectory of Intracortical Myelination in Schizophrenia  
499 Implicates White Matter in Disease Pathophysiology and the Therapeutic Mechanism  
500 of Action of Antipsychotics. *Biol Psychiatry Cogn Neurosci Neuroimaging* **3**, 454-462,  
501 doi:10.1016/j.bpsc.2017.03.007 (2018).
- 502 32 Zatorre, R. J., Fields, R. D. & Johansen-Berg, H. Plasticity in gray and white:  
503 neuroimaging changes in brain structure during learning. *Nat Neurosci* **15**, 528-536,  
504 doi:10.1038/nn.3045 (2012).
- 505 33 Lodygensky, G. A. *et al.* In vivo MRI analysis of an inflammatory injury in the  
506 developing brain. *Brain Behav Immun* **24**, 759-767, doi:10.1016/j.bbi.2009.11.005  
507 (2010).
- 508 34 Xie, M. *et al.* Rostrocaudal analysis of corpus callosum demyelination and axon  
509 damage across disease stages refines diffusion tensor imaging correlations with  
510 pathological features. *J Neuropathol Exp Neurol* **69**, 704-716,  
511 doi:10.1097/NEN.0b013e3181e3de90 (2010).
- 512 35 Winkiewski, P. J. *et al.* Understanding the Physiopathology Behind Axial and Radial  
513 Diffusivity Changes-What Do We Know? *Front Neurol* **9**, 92,  
514 doi:10.3389/fneur.2018.00092 (2018).

- 515 36 Pasternak, O., Sochen, N., Gur, Y., Intrator, N. & Assaf, Y. Free water elimination and  
516 mapping from diffusion MRI. *Magn Reson Med* **62**, 717-730, doi:10.1002/mrm.22055  
517 (2009).
- 518 37 Lebel, C. & Beaulieu, C. Longitudinal development of human brain wiring continues  
519 from childhood into adulthood. *J Neurosci* **31**, 10937-10947,  
520 doi:10.1523/JNEUROSCI.5302-10.2011 (2011).
- 521 38 Bava, S. *et al.* Longitudinal characterization of white matter maturation during  
522 adolescence. *Brain Res* **1327**, 38-46, doi:10.1016/j.brainres.2010.02.066 (2010).
- 523 39 Brouwer, R. M. *et al.* White matter development in early puberty: a longitudinal  
524 volumetric and diffusion tensor imaging twin study. *PLoS One* **7**, e32316,  
525 doi:10.1371/journal.pone.0032316 (2012).
- 526 40 Giorgio, A. *et al.* Longitudinal changes in grey and white matter during adolescence.  
527 *Neuroimage* **49**, 94-103, doi:10.1016/j.neuroimage.2009.08.003 (2010).
- 528 41 Lebel, C., Walker, L., Leemans, A., Phillips, L. & Beaulieu, C. Microstructural  
529 maturation of the human brain from childhood to adulthood. *Neuroimage* **40**, 1044-  
530 1055, doi:10.1016/j.neuroimage.2007.12.053 (2008).
- 531 42 Giorgio, A. *et al.* Changes in white matter microstructure during adolescence.  
532 *Neuroimage* **39**, 52-61, doi:10.1016/j.neuroimage.2007.07.043 (2008).
- 533 43 Douaud, G. *et al.* Schizophrenia delays and alters maturation of the brain in  
534 adolescence. *Brain* **132**, 2437-2448, doi:10.1093/brain/awp126 (2009).
- 535 44 Epstein, K. A. & Kumra, S. White matter fractional anisotropy over two time points in  
536 early onset schizophrenia and adolescent cannabis use disorder: A naturalistic  
537 diffusion tensor imaging study. *Psychiatry Res* **232**, 34-41,  
538 doi:10.1016/j.psychres.2014.10.010 (2015).
- 539 45 Wechsler, D. Wechsler Abbreviated Scale of Intelligence. *The Psychological*  
540 *Corporation: Harcourt Brace & Company. New York, NY* (1999).
- 541 46 Kaufman, J. *et al.* Schedule for Affective Disorders and Schizophrenia for School-Age  
542 Children-Present and Lifetime Version (K-SADS-PL): initial reliability and validity data.  
543 *J Am Acad Child Adolesc Psychiatry* **36**, 980-988, doi:10.1097/00004583-199707000-  
544 00021 (1997).
- 545 47 Kay, S. R., Fiszbein, A. & Opler, L. A. The positive and negative syndrome scale  
546 (PANSS) for schizophrenia. *Schizophr Bull* **13**, 261-276 (1987).
- 547 48 Shaffer, D. *et al.* A children's global assessment scale (CGAS). *Arch Gen Psychiatry*  
548 **40**, 1228-1231 (1983).
- 549 49 Angold, A. *et al.* Development of a short questionnaire for use in epidemiological  
550 studies of depression in children and adolescents. *Int J Method Psych* **5**, 237-249  
551 (1995).
- 552 50 Andreasen, N. C., Pressler, M., Nopoulos, P., Miller, D. & Ho, B. C. Antipsychotic  
553 dose equivalents and dose-years: a standardized method for comparing exposure to  
554 different drugs. *Biol Psychiatry* **67**, 255-262, doi:10.1016/j.biopsych.2009.08.040  
555 (2010).
- 556 51 Andersson, J. L., Skare, S. & Ashburner, J. How to correct susceptibility distortions in  
557 spin-echo echo-planar images: application to diffusion tensor imaging. *Neuroimage*  
558 **20**, 870-888, doi:10.1016/S1053-8119(03)00336-7 (2003).
- 559 52 Smith, S. M. *et al.* Advances in functional and structural MR image analysis and  
560 implementation as FSL. *Neuroimage* **23 Suppl 1**, S208-219,  
561 doi:10.1016/j.neuroimage.2004.07.051 (2004).
- 562 53 Andersson, J. L. R. & Sotiropoulos, S. N. An integrated approach to correction for off-  
563 resonance effects and subject movement in diffusion MR imaging. *Neuroimage* **125**,  
564 1063-1078, doi:10.1016/j.neuroimage.2015.10.019 (2016).
- 565 54 Smith, S. M. Fast robust automated brain extraction. *Hum Brain Mapp* **17**, 143-155,  
566 doi:10.1002/hbm.10062 (2002).
- 567 55 Behrens, T. E. *et al.* Characterization and propagation of uncertainty in diffusion-  
568 weighted MR imaging. *Magn Reson Med* **50**, 1077-1088, doi:10.1002/mrm.10609  
569 (2003).



- 570 56 Smith, S. M. *et al.* Tract-based spatial statistics: voxelwise analysis of multi-subject  
571 diffusion data. *Neuroimage* **31**, 1487-1505, doi:10.1016/j.neuroimage.2006.02.024  
572 (2006).
- 573 57 Nakagawa, S. & Cuthill, I. C. Effect size, confidence interval and statistical  
574 significance: a practical guide for biologists. *Biol Rev Camb Philos Soc* **82**, 591-605,  
575 doi:10.1111/j.1469-185X.2007.00027.x (2007).
- 576

577 **Acknowledgements**

578 We thank the study participants and the Youth-TOP clinicians involved in recruitment and  
579 assessment at the Norwegian Centre for Mental Disorders (NORMENT) and the  
580 Diakonhjemmet Hospital, Oslo, Norway (Runar Elle Smelror, Kirsten Wedervang-Resell,  
581 Cecilie Haggag Johannessen, Tarje Tinderholt, Tove Matzen Drachmann). Further, we like to  
582 thank Kristine Engen and Brian Frank O'Donnell for proofreading. This work was supported by  
583 the Research Council of Norway, grant numbers 223273, 213700, and 250358; the South-  
584 Eastern Norway Regional Health Authority, grant numbers 2016-118 and 2017-097; and KG  
585 Jepsen Centre for Psychosis Research.

586 **Author Contributions**

587 CB undertook the processing of the imaging data, the statistical analysis, the literature search,  
588 interpreted the results and wrote the first draft of the manuscript. TPG helped with the  
589 processing of the imaging data. VL was significantly involved in the participant inclusion and  
590 data acquisition for Youth-TOP and calculated current and cumulative chlorpromazine  
591 equivalents. IA designed the ongoing longitudinal Youth-TOP research study the data is drawn  
592 from. IA, AMM and OAA obtained funding and contributed to the data acquisition. All authors  
593 contributed to the critical revision of the manuscript and approved the final draft for submission.

594 **Additional Information**

595 **Competing interests**

596 The authors declare no competing interests.

597

598

599

600

601

602

603

604

605 **Figures**

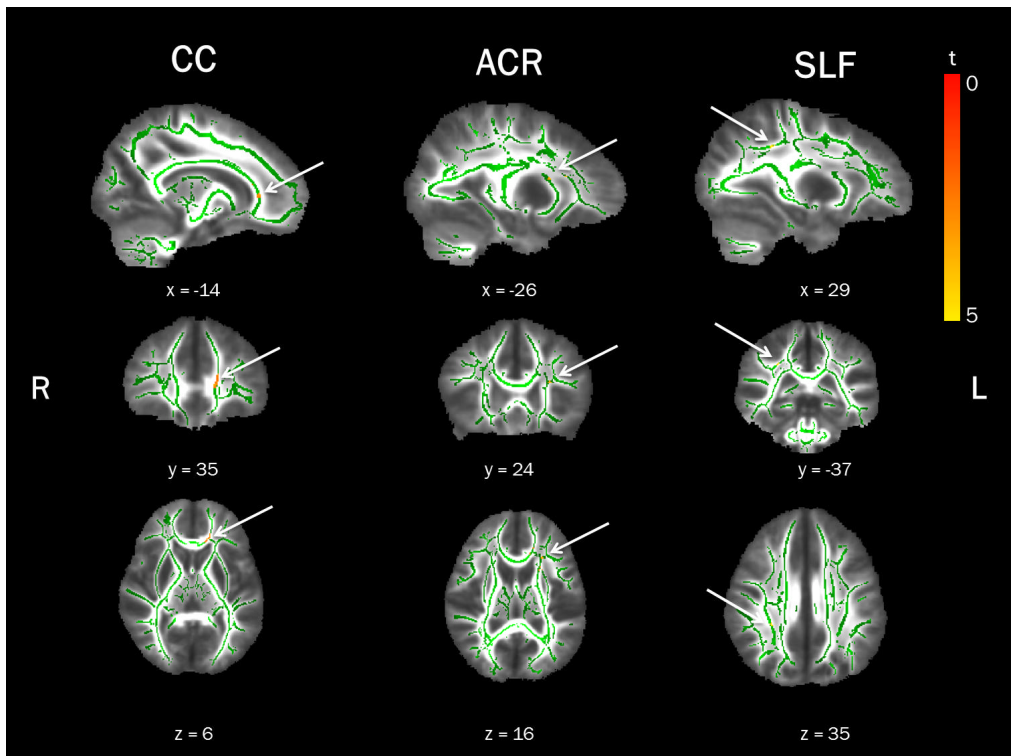

607 **Figure 1| Lower fractional anisotropy (FA) in early onset psychosis (EOP) patients in**  
608 **comparison to healthy controls.** Displayed are significant FWE-corrected TBSS results (red-  
609 yellow,  $p \leq 0.01$ ), contrasting EOP patients against healthy controls, overlaid on the study-specific mean  
610 FA skeleton in green and the mean FA image. Results shown underwent threshold-free cluster  
611 enhancement and are corrected for age and sex. CC = corpus callosum, ACR = anterior corona radiata,  
612 SLF = superior longitudinal fasciculus, R = right, L = left.

613

614

615

616

617

618

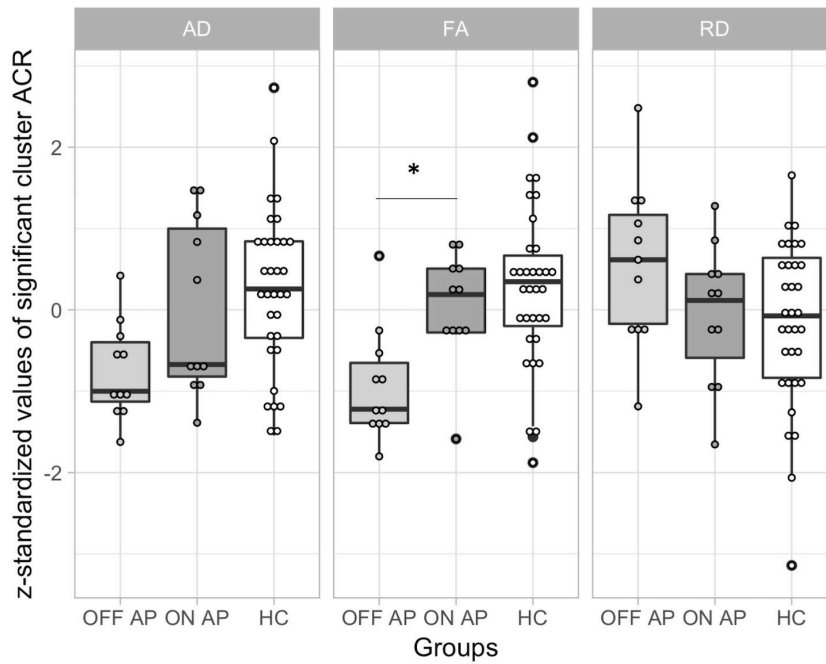

619

620 **Figure 2] Extracted scalar diffusion values of the left anterior corona radiata (ACR)**  
621 **cluster stratified by antipsychotic use, in comparison to the healthy controls (HC).** Data  
622 is z-standardized and presented as boxplots for the different scalar diffusion measures overlaid with raw  
623 data points. HC are depicted in white, EOP patients on antipsychotic medication in dark grey and EOP  
624 patients off antipsychotic medication in light grey. EOP = Early onset psychosis, AP = Antipsychotic use  
625 (on = yes, off = no), AD = axial diffusion, FA = fractional anisotropy, RD = radial diffusion. Significant  
626 differences in scalar measures between patient subgroups, based on linear regression models, are  
627 indicated with a star.

628

629

630

631

632

633

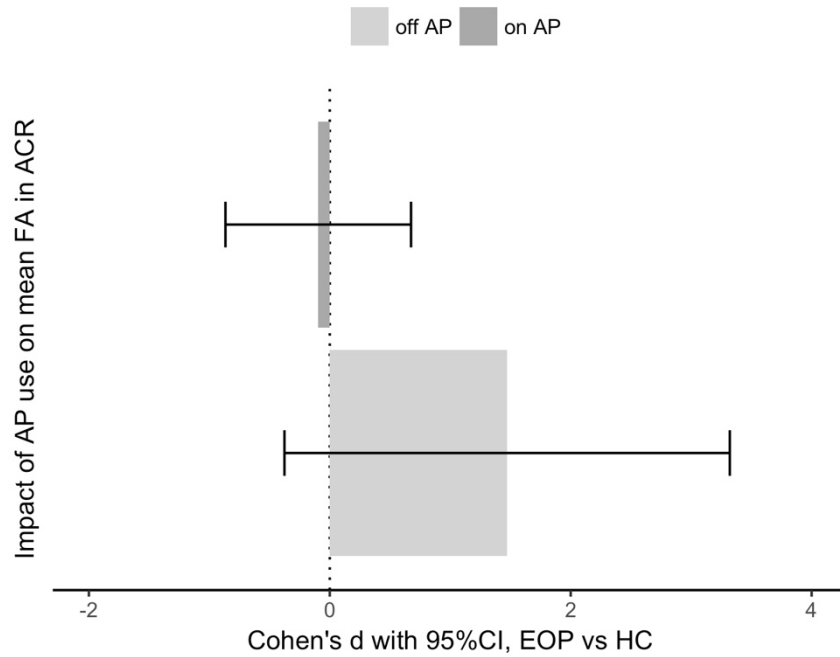

634

635 **Figure 3| Effect size of antipsychotic medication effect on fractional anisotropy (FA) in**  
636 **left anterior corona radiata (ACR).** Effect size is presented as Cohen's d with 95% confidence  
637 interval (CI) to show the standardized difference of antipsychotic medication status (AP) of early onset  
638 psychosis (EOP) patients relative to healthy controls (HC, N = 28). EOP patients on AP (N = 8) are  
639 depicted in dark grey and EOP patients off AP (N = 11) are depicted in light grey. Results are controlled  
640 for age, sex and BMI.

641

642

643

644

645

646

647

648

649

650

651

652 **Tables**

653 **Table 1| General sample characteristics.**

|                               | <i>EOP patients overall</i><br><i>N = 22</i> | <i>Healthy controls</i><br><i>N = 33</i> | <i>Statistics</i><br><i>group-level</i> |
|-------------------------------|----------------------------------------------|------------------------------------------|-----------------------------------------|
| <b>Sex (m/f)</b>              | 7/15                                         | 13/20                                    | $\chi^2 = 0.33, p = 0.775$              |
| <b>Age at MRI (y)</b>         | 16.69 ± 1.13                                 | 16.08 ± 1.43                             | $t = 1.76, p = 0.085$                   |
| Range                         | 14.53 – 18.25                                | 12.67 – 18.15                            |                                         |
| <b>Handedness (r/l)</b>       | 18/2                                         | 30/2                                     | FET, $p = 0.634$                        |
| Missing N (%)                 | 2 (9.1)                                      | 1 (3)                                    |                                         |
| <b>Parental Education (y)</b> |                                              |                                          |                                         |
| Mother                        | 15.05 ± 1.94                                 | 16.13 ± 2.09                             | $t = -1.94, p = 0.058$                  |
| Range                         | 11 – 19                                      | 12 – 22                                  |                                         |
| Missing N (%)                 | 0                                            | 2 (6.1)                                  |                                         |
| Father                        | 14.67 ± 2.87                                 | 15.57 ± 2.39                             | $t = -1.18, p = 0.245$                  |
| Range                         | 10 – 23                                      | 11 – 20                                  |                                         |
| Missing N (%)                 | 1 (4.5)                                      | 3 (9.1)                                  |                                         |
| <b>IQ</b>                     | 102.74 ± 11.82                               | 101.81 ± 11.32                           | $t = 0.27, p = 0.785$                   |
| Range                         | 83 – 132                                     | 70 – 116                                 |                                         |
| Missing N (%)                 | 3 (13.63)                                    | 1 (3)                                    |                                         |
| <b>CGAS</b>                   | 44.95 ± 8.57                                 | 89.15 ± 6.56                             | MWU test, $p < 0.001$                   |
| Range                         | 32 – 59                                      | 75 – 98                                  |                                         |
| <b>MFQ</b>                    | 29.05 ± 12.79                                | 6.19 ± 6.5                               | MWU test, $p < 0.001$                   |
| Range                         | 5 – 52                                       | 0 – 31                                   |                                         |
| Missing N (%)                 | 1 (4.5)                                      | 1 (3)                                    |                                         |
| <b>BMI (kg/m<sup>2</sup>)</b> | 21.65 ± 5.6                                  | 20.81 ± 2.6                              | MWU test, $p = 0.704$                   |
| Range                         | 15.4 ± 35.4                                  | 16.7 ± 26.0                              |                                         |
| Missing N (%)                 | 3 (13.63)                                    | 5 (15.15)                                |                                         |
| <b>Cannabis (yes/no)</b>      | 7/15                                         | 1/32                                     | FET, $p = 0.005$                        |

654 All values in mean ± standard deviation, N = Number of participants, m = male, f = female, y = years, r  
655 = right, l = left, IQ = Intelligence Quotient, BMI = Body Mass Index, CGAS = Children's Global  
656 Assessment Scale, MFQ = Mood and Feelings Questionnaire, MWU = Mann-Whitney-U, FET = Fisher's  
657 Exact Test

658 **Table 2| Patient clinical characteristics stratified by antipsychotic medication status**

|                               | <i>EOP patients</i><br><i>Off AP at scan</i><br><i>N = 11</i> | <i>EOP patients</i><br><i>On AP at scan</i><br><i>N = 11</i> | <i>Statistics</i><br><i>patient-level</i> |
|-------------------------------|---------------------------------------------------------------|--------------------------------------------------------------|-------------------------------------------|
| <b>Sex (m/f)</b>              | 5/6                                                           | 2/9                                                          | FET, $p = 0.361$                          |
| <b>Age Scan (y)</b>           | $15.94 \pm 1.49$                                              | $17.44 \pm 0.65$                                             | <b><math>t = -4.19, p = 0.0006</math></b> |
| Range                         | 14.53 – 17.25                                                 | 16.53 – 18.25                                                |                                           |
| <b>BMI (kg/m<sup>2</sup>)</b> | $20.53 \pm 4.32$                                              | $23.2 \pm 7.02$                                              | MWU test, $p = 0.492$                     |
| Range                         | 15.4 – 28.7                                                   | 16.3 – 35.4                                                  |                                           |
| Missing N (%)                 | 0                                                             | 3 (27.3)                                                     |                                           |
| <b>CGAS</b>                   | $46 \pm 8$                                                    | $43.91 \pm 9.38$                                             | $t = 0.56, p = 0.580$                     |
| Range                         | 34 – 59                                                       | 32 – 58                                                      |                                           |
| <b>MFQ</b>                    | $30.82 \pm 12.6$                                              | $27.1 \pm 13.39$                                             | $t = 0.65, p = 0.521$                     |
| Range                         | 5 – 52                                                        | 8 – 49                                                       |                                           |
| Missing N (%)                 | 0                                                             | 1 (9.1)                                                      |                                           |
| <b>PANSS</b>                  |                                                               |                                                              |                                           |
| <i>positive</i>               | $19.09 \pm 3.83$                                              | $17.18 \pm 3.84$                                             | $t = 1.17, p = 0.257$                     |
| Range                         | 12 – 25                                                       | 13 – 26                                                      |                                           |
| <i>negative</i>               | $22.09 \pm 7.13$                                              | $18.27 \pm 6.96$                                             | $t = 1.27, p = 0.218$                     |
| Range                         | 9 – 32                                                        | 7 – 32                                                       |                                           |
| <i>general</i>                | $38.73 \pm 8.44$                                              | $36.27 \pm 7.89$                                             | $t = 0.70, p = 0.489$                     |
| Range                         | 28 – 54                                                       | 24 – 52                                                      |                                           |
| <b>Age of Onset (y)</b>       | $14.39 \pm 1.92$                                              | $14.83 \pm 2.07$                                             | $t = -0.51, p = 0.614$                    |
| Range                         | 10 – 16                                                       | 12 – 17.6                                                    |                                           |
| <b>DUP (w)</b>                | $67.36 \pm 68.33$                                             | $24.73 \pm 35.58$                                            | MWU test, <b><math>p = 0.003</math></b>   |
| Range                         | 14 – 227                                                      | 3 – 125                                                      |                                           |
| <b>DUI (y)</b>                | $1.54 \pm 1.44$                                               | $2.61 \pm 2.17$                                              | MWU test, $p = 0.401$                     |
| Range                         | 0.47 – 4.53                                                   | 0.33 – 5.97                                                  |                                           |
| <b>Diagnosis</b>              |                                                               |                                                              |                                           |
| SCZ                           | 7                                                             | 7                                                            |                                           |
| SCA                           | 1                                                             | 0                                                            |                                           |
| NOS                           | 3                                                             | 4                                                            |                                           |
| <b>Antipsychotics</b>         |                                                               |                                                              |                                           |
| Aripiprazole                  |                                                               | 5                                                            |                                           |
| Risperidone                   |                                                               | 3                                                            |                                           |
| Quetiapine                    |                                                               | 3                                                            |                                           |
| <b>CPZ</b>                    |                                                               |                                                              |                                           |
| <i>current</i>                |                                                               | $272.3 \pm 140.83$                                           |                                           |
| Range                         |                                                               | 151.52 – 559.44                                              |                                           |

|                              |             |              |            |
|------------------------------|-------------|--------------|------------|
| <i>cumulative</i>            | 0.08 ± 0.28 | 21.6 ± 19.13 |            |
| (AP-naïve, N = 9)            |             |              |            |
| Range                        | 0 – 0.92    | 1.69 – 59.28 |            |
| <b>Cannabis use</b> (yes/no) | 3/8         | 4/7          | FET, p = 1 |

659 \*All values in mean ± standard deviation, AP = antipsychotics, N = number of participants, m = male, f  
660 = female, y = years, r = right, l = left, IQ = Intelligence Quotient, BMI = Body Mass Index, CGAS =  
661 Children’s Global Assessment Scale, MFQ = Mood and Feelings Questionnaire, PANSS = Positive and  
662 Negative Symptom Scale, DUP = Duration of Untreated Psychosis, DUI = Duration of illness, SCZ =  
663 schizophrenia, SCA = schizoaffective, NOS = psychosis, not other specified, CPZ = chlorpromazine  
664 equivalent, MWU = Mann-Whitney-U, FET = Fisher’s Exact Test.

665

666 **Table 3| White matter cluster of reduced fractional anisotropy in early onset psychosis**  
667 **patients relative to healthy controls.**

| Cluster | Region* <sup>1</sup>                                                              | Side | Voxels | MNI coordinates in mm |     |    | t-values |
|---------|-----------------------------------------------------------------------------------|------|--------|-----------------------|-----|----|----------|
|         |                                                                                   |      |        | X                     | Y   | Z  |          |
| 4       | Genu of corpus callosum                                                           | L    | 150    | -14                   | 35  | 6  | 3.35     |
| 3       | Anterior corona radiata* <sup>2</sup>                                             | L    | 46     | -26                   | 13  | 14 | 3.69     |
| 2       | Superior longitudinal fasciculus                                                  | R    | 12     | 29                    | -37 | 35 | 4.81     |
| 1       | Anterior corona radiata (16% Inferior fronto-occipital fasciculus) * <sup>3</sup> | L    | 9      | -26                   | 24  | 16 | 4.05     |

668 \*<sup>1</sup> Johns Hopkins University International Consortium for Brain Mapping (JHU ICBM)-DTI-81 white  
669 matter atlas and JHU white matter tractography atlas (in brackets) were utilized to label significant  
670 clusters with specific tract names

671 \*<sup>2</sup> 6% uncinate fasciculus/ 5% inferior fronto-occipital fasciculus according to JHU White-Matter  
672 Tractography Atlas

673 \*<sup>3</sup> 11% anterior thalamic radiation, 8% uncinate fasciculus according to JHU White-Matter Tractography  
674 Atlas
